# Supplementary material for: Impact of macrolide therapy in critically ill patients with acute respiratory failure: a desirability of outcome ranking analysis to investigate the OUTCOMEREA database
Source: Springer Nature journal article supplement (doi:10.1007/s00134-019-05586-1), 2019-03-14
Supplement: MOESM6 [file 16548642]

**Supplemental Table E3: Unweighted and IPTW-adjusted probabilities of a better outcome in the macrolides group compared to the non-macrolide group**

| **Analysis** | **Probability of a better outcome** | **IPTW-probability of a better outcome** |
| --- | --- | --- |
| Death and secondary infection acquisition | 51.2% (95% CI 49.7% - 52.7%) | 51 % (95%CI 48.9% - 53.2%) |
| Death and mechanical ventilation duration | 49.6% (95%CI 47.8% - 51.3%) | 49.4% (95%CI 46.8% - 51.6%) |
